# Supplementary material for: Validation of the FEEL-KJ: An Instrument to Measure Emotion Regulation Strategies in Children and Adolescents
Source: PubMed Central journal article supplement (PMC4557990; doi:10.1371/journal.pone.0137080), 2015-09-02
Supplement: pone.0137080.s001.pdf [file pone.0137080.s001.pdf]

## S1 Appendix: Dutch FEEL-KJ example items

Below are five example items of the Dutch FEEL-KJ. For the full set of items, please contact Hogrefe Publishers at [info@hogrefe.nl](mailto:info@hogrefe.nl).

**Dutch FEEL-KJ example items for anger. Items are preceded by an introduction and the following sentence: ‘Wanneer ik boos ben ...’**

---

|                          |                                                 |
|--------------------------|-------------------------------------------------|
| <b>Problem Solving</b>   | Probeer ik dat wat me boos maakt te veranderen. |
| <b>Distraction</b>       | Doe ik iets wat ik leuk vind.                   |
| <b>Humor Enhancement</b> | Denk ik aan dingen die me gelukkig maken.       |
| <b>Withdrawal</b>        | Trek ik me terug.                               |
| <b>Rumination</b>        | Krijg ik het maar niet uit mijn hoofd.          |

---

**Note.** Items are similar for anxiety and sadness (total N = 90).
